# Supplementary material for: Synthesis, crystal structure and magnetic properties of a CuII–WV/IVbimetallic complex with a novel open framework structure
Source: Royal Society of Chemistry journal article supplement (doi:10.1039/b304276f), 2003-01-01
Supplement: b304276f.pdf [file b304276f.pdf]

## Supplementary Material (ESI)

### Synthesis, crystal structure and magnetic properties of a Cu(II)-W(V) bimetallic complex with a novel open framework structure

Feng-Tai Chen,<sup>a</sup> Dong-Feng Li,<sup>a</sup> Song Gao,<sup>b</sup> Xin-Yi Wang,<sup>b</sup> Yi-Zhi Li,<sup>a\*</sup> Li-Min Zheng,<sup>a\*</sup> Wen-Xia Tang<sup>a</sup>

<sup>a</sup>State Key Laboratory of Coordination Chemistry, Coordination Chemistry Institute, Nanjing University, Nanjing 210093, P. R. China

E-mail: [lmzheng@netra.nju.edu.cn](mailto:lmzheng@netra.nju.edu.cn)

<sup>b</sup>State Key Laboratory of Rare Earth Materials Chemistry and Applications, Peking University, Beijing 100870, P. R. China

**Figure S1** Thermal analysis of complex **1**.

**Figure S2** IR spectra of complex **1**.

**Figure S3** XRD pattern of complex **1**.

**Figure S4** Real( $\chi'$ ) and imaginary( $\chi''$ ) ac magnetic susceptibilities as a function of temperature with frequencies 111, 199, 355, 633 and 1111Hz for **1**.

**Figure S5** Magnetic hysteresis loop at T = 1.8 K.

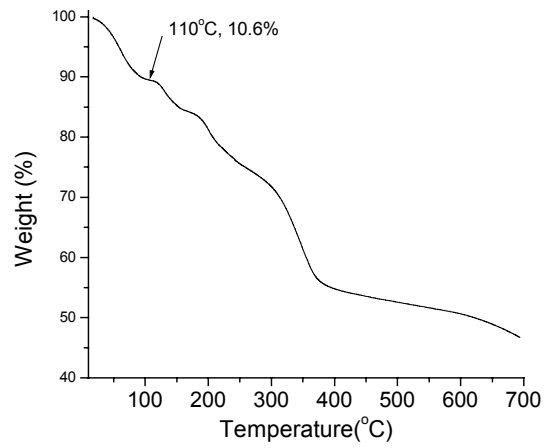

**Figure S1**

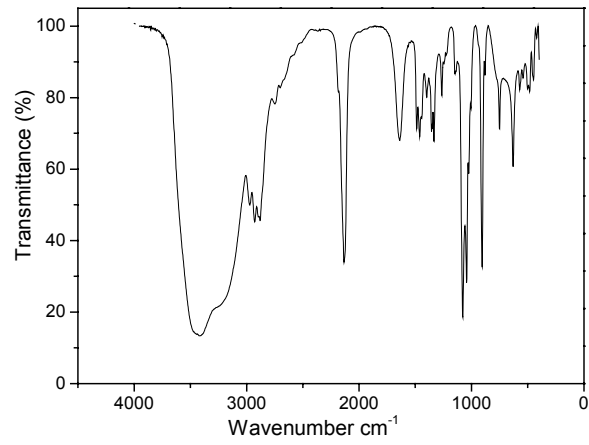

**Figure S2**

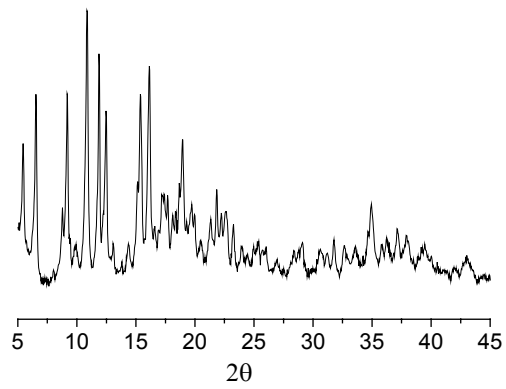

**Figure S3**

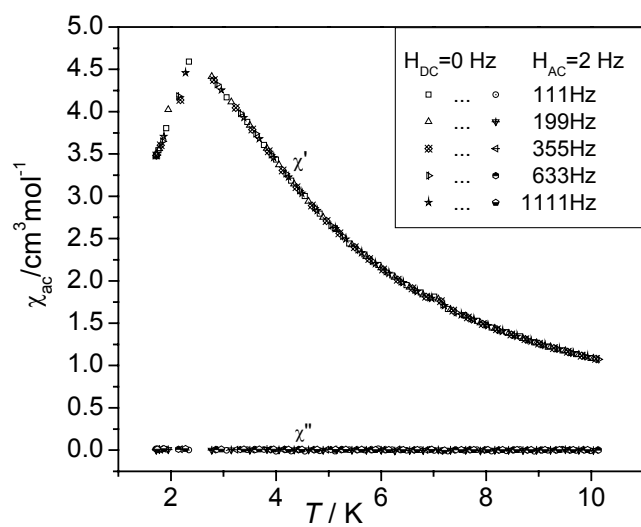

Figure S4

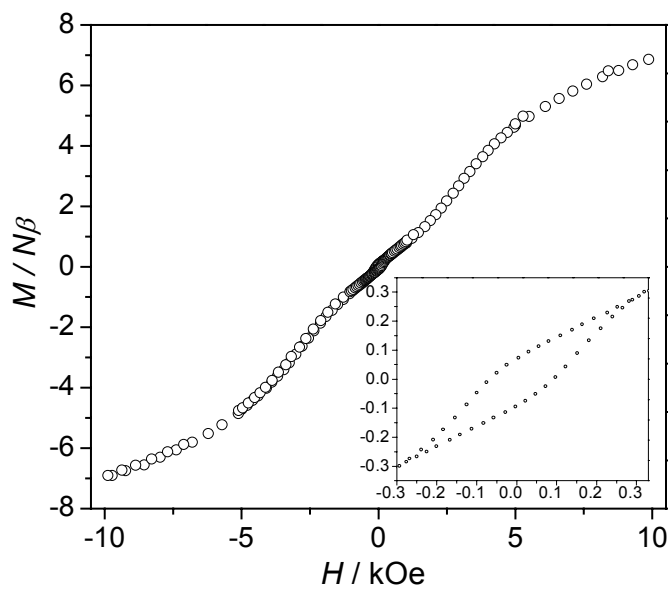

Figure S5
